# Supplementary material
Source: PubMed Central journal article supplement (PMC2884332)
Supplement: jn.109.119925_1.pdf [file jn.109.119925_1.pdf]

Supplemental Figure 1. Consort diagram of children assigned zinc and placebo

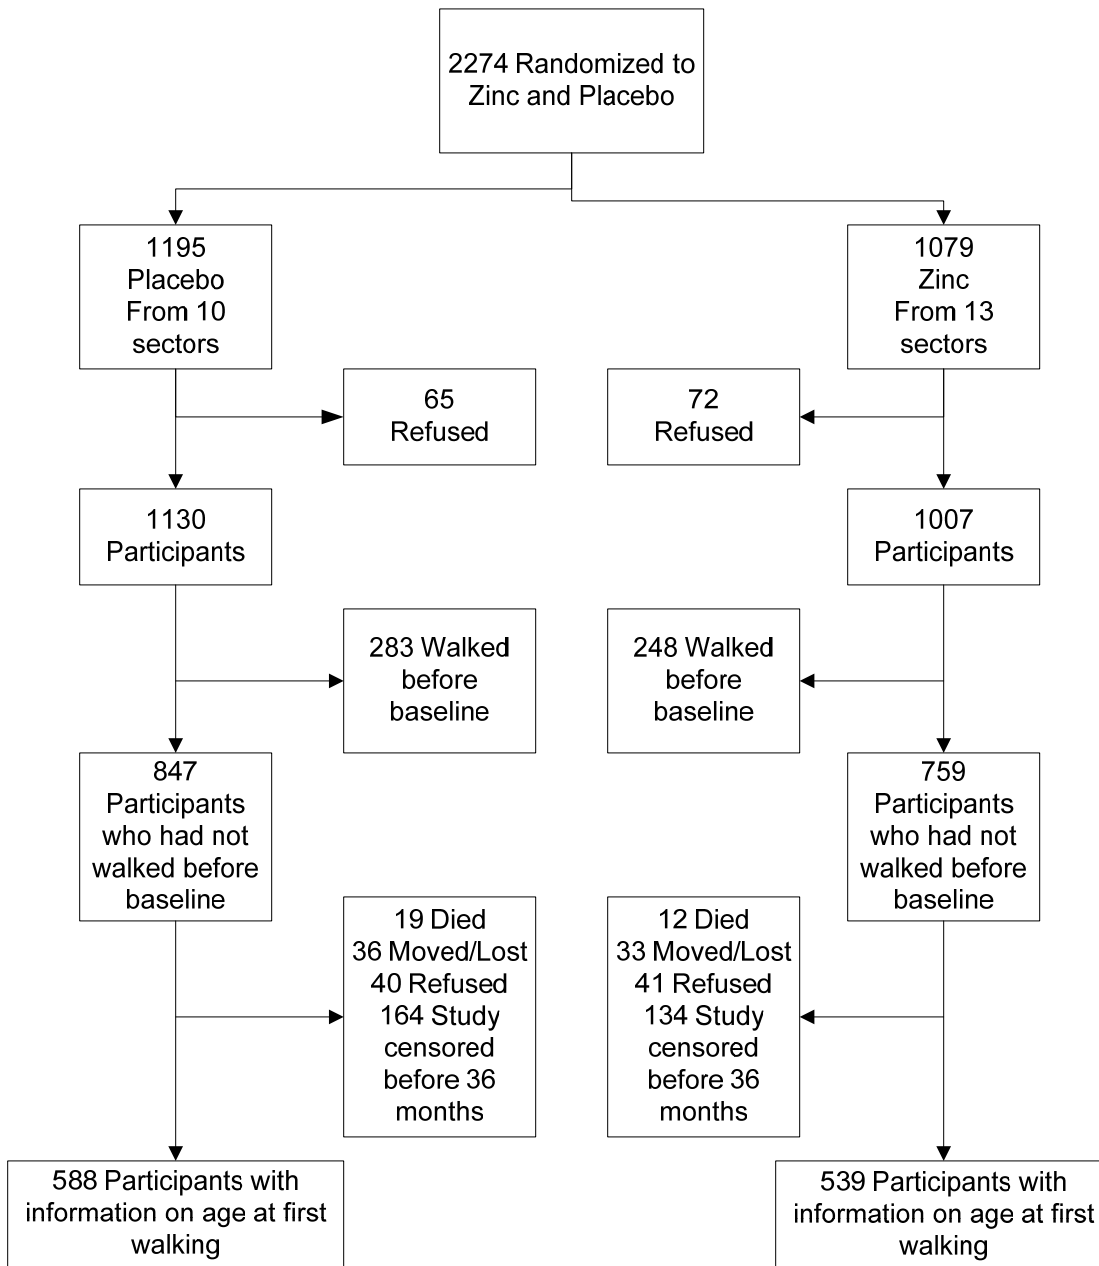

Supplemental Figure 2. Consort diagram of children assigned placebo, iron+folic acid alone, iron+folic acid and zinc

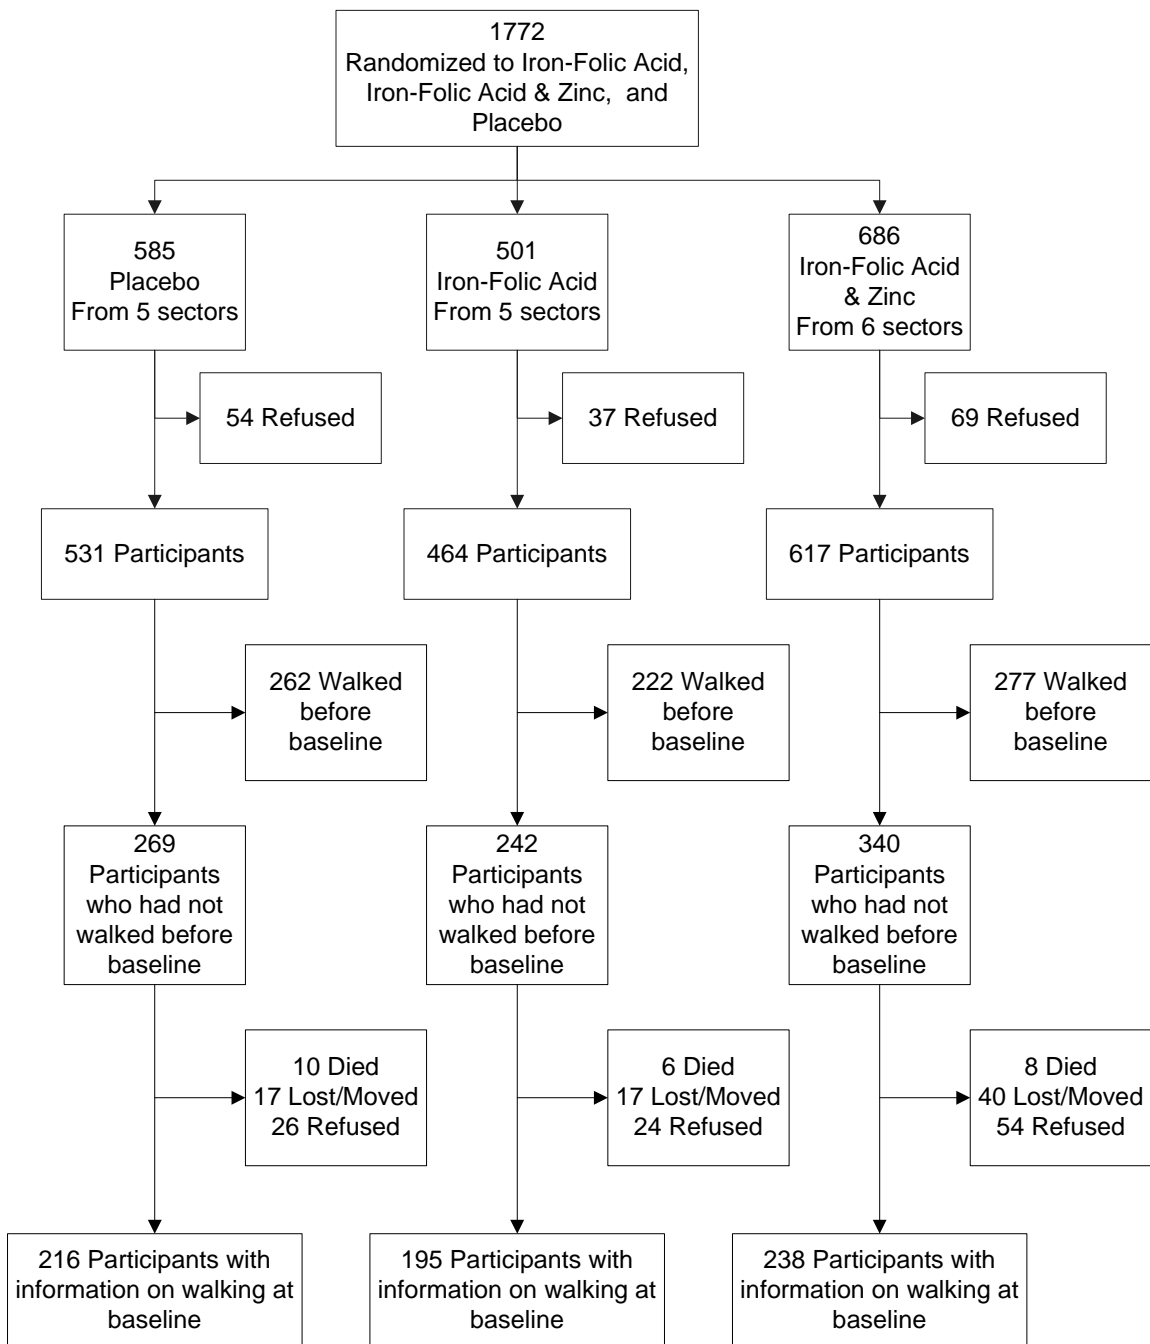

## Online Supplemental Materials

Supplemental Table 1. Baseline comparability between zinc and placebo groups<sup>1</sup>

| Variables             |                          | Placebo      | Zinc         |
|-----------------------|--------------------------|--------------|--------------|
| <i>n</i>              |                          | 588          | 538 *        |
| Age (mo)              |                          |              |              |
|                       | 1-5                      | 494 (84.0)   | 465 (86.4)   |
|                       | 6-11                     | 61 (10.4)    | 58 (10.8)    |
|                       | 12-23                    | 33 (5.6)     | 15 (2.8)     |
| Sex                   |                          |              |              |
|                       | Male                     | 304 (51.7)   | 269 (50.0)   |
|                       | Female                   | 284 (48.3)   | 269 (50.0)   |
| Ethnic Group          |                          |              |              |
|                       | Pahadi                   | 74 (12.6)    | 100 (18.6)   |
|                       | Madeshi                  | 509 (86.7)   | 436 (81.2)   |
| Caste                 |                          |              |              |
|                       | Brahmin                  | 28 (4.8)     | 29 (5.4)     |
|                       | Chhetri                  | 10 (1.7)     | 33 (6.2)     |
|                       | Vaiysha                  | 312 (53.2)   | 380 (70.8)   |
|                       | Shudra                   | 77 (13.1)    | 52 (9.7)     |
|                       | Muslim/Other             | 160 (27.3)   | 43 (8.0)     |
| Paternal Literacy     |                          | 276 (52.3)   | 285 (58.4)   |
| Maternal Literacy     |                          | 104 (19.7)   | 114 (23.4)   |
| Paternal Occupation   |                          |              |              |
|                       | Farmer                   | 178 (33.7)   | 238 (48.8)   |
|                       | Laborer                  | 226 (42.8)   | 132 (27.1)   |
|                       | Business                 | 81 (15.3)    | 54 (11.1)    |
|                       | Private Service          | 27 (5.1)     | 31 (6.4)     |
|                       | Government               | 8 (1.5)      | 14 (2.9)     |
|                       | None                     | 6 (1.1)      | 14 (2.9)     |
| Prior Child Mortality |                          |              |              |
|                       | Rate/1000 live births    | 89.1 (190.7) | 94.8 (184.0) |
|                       | ≥1 prior child deaths    | 131 (24.9)   | 112 (23.2)   |
| Electricity in House  |                          | 177 (30.2)   | 121 (22.5)   |
| Ownership             |                          |              |              |
|                       | Bicycle                  | 303 (51.6)   | 324 (60.3)   |
|                       | Cart                     | 66 (11.2)    | 92 (17.1)    |
|                       | Radio                    | 129 (22.00)  | 173 (32.2)   |
|                       | TV                       | 118 (20.1)   | 108 (20.1)   |
|                       | khet-Paddy farm land     | 258 (44.4)   | 266 (51.6)   |
|                       | Bari-Non-paddy farm land | 108 (18.6)   | 113 (21.9)   |
|                       | Cattle                   | 328 (55.8)   | 373 (69.3)   |
|                       | Goats                    | 254 (43.2)   | 211 (39.2)   |
| House Wall Material   |                          |              |              |
|                       | None                     | 2 (0.3)      | 0 (0.0)      |
|                       | Thatch                   | 48 (8.2)     | 101 (18.8)   |
|                       | Mud                      | 464 (79.1)   | 370 (68.9)   |
|                       | Wood                     | 13 (2.2)     | 26 (4.8)     |
|                       | Concrete                 | 60 (10.2)    | 40 (7.5)     |
| House Roof Material   |                          |              |              |
|                       | None                     | 6 (1.0)      | 0 (0.0)      |
|                       | Thatch                   | 56 (9.5)     | 45 (8.4)     |
|                       | Tile/Tin                 | 507 (86.4)   | 481 (89.6)   |
|                       | Concrete                 | 18 (3.1)     | 11 (2.1)     |
| Latrine at House      |                          | 40 (6.8)     | 33 (6.2)     |
| Water Source          |                          |              |              |
|                       | Tube well                | 581 (99.0)   | 467 (87.0)   |
|                       | Ring well                | 6 (1.0)      | 70 (13.0)    |

<sup>1</sup> Values are n (%)

\* One child was missing demographic and socioeconomic data

Online Supplemental Materials

Supplemental Table 2. Distribution and numbers of tablets consumed by zinc and placebo groups among those not yet walking at the start of the trial<sup>1</sup>

|                                                   | Placebo             | Zinc                                      |
|---------------------------------------------------|---------------------|-------------------------------------------|
| All enrolled children                             | 588                 | 539                                       |
| Tablets consumed                                  |                     |                                           |
| 0-59                                              | 100 (17.0)          | 75 (13.9)                                 |
| 60-179                                            | 79 (13.4)           | 109 (20.2)                                |
| 180-364                                           | 283 (48.1)          | 265 (49.2)                                |
| > 364                                             | 126 (21.4)          | 90 (16.7) ( <i>P</i> =0.005) <sup>2</sup> |
| Mean±SD                                           | 246.4±145.1         | 235.5±134.4                               |
| Median % of total possible tablets consumed (IQR) | 72.6<br>(45.4-86.0) | 67.9<br>(41.0-82.7)                       |
| Infants < 12 mo at entry                          | 555                 | 523                                       |
| Tablets consumed                                  |                     |                                           |
| 0-59                                              | 71 (12.8)           | 63 (12.0)                                 |
| 60-179                                            | 75 (13.5)           | 106 (20.2)                                |
| 180-364                                           | 283 (51.0)          | 265 (50.6)                                |
| > 364                                             | 126 (22.7)          | 90 (17.2) ( <i>P</i> =0.009) <sup>2</sup> |
| Mean±SD                                           | 260.0±137.7         | 241.7±131.1                               |
| Median % of total possible tablets consumed (IQR) | 74.9<br>(50.8-86.6) | 68.6<br>(45.1-83.0)                       |

<sup>1</sup> Values are n (%), means ±SD, or median % of total possible tablets consumed (interquartile range)

<sup>2</sup> Chi-square comparison of distributions of tablet consumption between placebo and zinc groups

Online Supplemental Materials

Supplemental Table 3: Mean ages at first sitting unassisted, running, jumping, and standing on one leg, and % > than 8, 24, 30, and 30 mo of age, respectively, at which these milestones were first attained among children having not yet attained them at baseline among zinc and placebo treatment groups<sup>1</sup>

| Treatment Group     | n   | Age, d      | Mean Difference (95% CI) |                    | >18 mo, n (%) | Relative Risk (95% CI) |                   |
|---------------------|-----|-------------|--------------------------|--------------------|---------------|------------------------|-------------------|
|                     |     |             | Crude                    | Adjusted           |               | Crude                  | Adjusted          |
| Sitting unassisted  |     |             |                          |                    |               |                        |                   |
| Placebo             | 299 | 209.0±30.1  |                          |                    | 43 (14.3)     |                        |                   |
| Zinc                | 330 | 205.8±34.0  | -3.3 (-8.3, 1.8)         | -3.4 (-8.7, 2.0)   | 43 (13.0)     | 0.91 (0.61, 1.34)      | 0.85 (0.55, 1.30) |
| Running             |     |             |                          |                    |               |                        |                   |
| Placebo             | 548 | 551.8±113.8 |                          |                    | 37 (6.8)      |                        |                   |
| Zinc                | 545 | 559.6±125.8 | 7.7 (-6.5, 22.0)         | 9.7 (-4.5, 23.9)   | 42 (7.7)      | 1.14 (0.75, 1.75)      | 1.18 (0.74, 1.88) |
| Jumping             |     |             |                          |                    |               |                        |                   |
| Placebo             | 450 | 715.5±151.3 |                          |                    | 58 (12.9)     |                        |                   |
| Zinc                | 446 | 705.9±155.1 | -9.6 (-29.7, 10.5)       | -12.4 (-31.0, 6.3) | 53 (11.9)     | 0.92 (0.65, 1.31)      | 0.87 (0.63, 1.20) |
| Standing on one leg |     |             |                          |                    |               |                        |                   |
| Placebo             | 534 | 757.9±148.2 |                          |                    | 89 (16.7)     |                        |                   |
| Zinc                | 550 | 747.1±148.0 | -10.8 (-28.4, 6.9)       | -3.5 (-20.2, 13.1) | 84 (15.3)     | 0.92 (0.70, 1.20)      | 1.02 (0.79, 1.33) |

<sup>1</sup> Values are means ±SD, means difference (95% CI), n (%), or relative risk (95% CI)

All adjusted differences and relative risks adjusted for ethnicity, assets, maternal literacy, prior child deaths using Generalized Estimating Equations (GEE).

## Online Supplemental Materials

Supplemental Table 4. Baseline comparability between placebo, iron+folic acid alone, and iron+folic acid and zinc

| Variables                | Placebo       | Iron+folic Acid | Iron+folic Acid & Zinc |
|--------------------------|---------------|-----------------|------------------------|
| <i>n</i>                 | 216           | 195             | 238                    |
|                          | n (%)         | n (%)           | n (%)                  |
| Age (mo)                 |               |                 |                        |
| 1-5                      | 127 (58.8)    | 110 (56.4)      | 148 (62.2)             |
| 6-11                     | 56 (25.9)     | 60 (30.8)       | 63 (26.5)              |
| 12-23                    | 33 (15.3)     | 25 (12.82)      | 27 (11.3)              |
| Sex                      |               |                 |                        |
| Male                     | 111 (51.4)    | 108 (55.4)      | 130 (54.2)             |
| Female                   | 105 (48.6)    | 87 (44.6)       | 108 (45.4)             |
| Ethnic Group             |               |                 |                        |
| Pahadi                   | 26 (12.0)     | 16 (8.2)        | 34 (14.3)              |
| Madeshi                  | 188 (87.0)    | 177 (90.8)      | 202 (84.9)             |
| Caste                    |               |                 |                        |
| Brahmin                  | 10 (4.6)      | 7 (3.6)         | 4 (1.7)                |
| Chhetri                  | 2 (0.9)       | 0 (0.0)         | 16 (6.7)               |
| Vaiysha                  | 113 (52.3)    | 120 (61.5)      | 144 (60.5)             |
| Shudra                   | 24 (11.1)     | 51 (26.2)       | 37 (15.6)              |
| Muslim/Other             | 67 (31.0)     | 17 (8.7)        | 37 (15.6)              |
| Paternal Literacy        | 79 (50.3)     | 77 (50.0)       | 95 (51.4)              |
| Maternal Literacy        | 26 (16.6)     | 22 (14.2)       | 35 (18.9)              |
| Paternal Occupation      |               |                 |                        |
| Farmer                   | 50 (31.9)     | 62 (40.3)       | 66 (35.7)              |
| Laborer                  | 67 (42.7)     | 63 (40.9)       | 64 (34.6)              |
| Business                 | 27 (17.2)     | 13 (8.4)        | 29 (15.7)              |
| Private Service          | 9 (5.7)       | 12 (7.8)        | 20 (10.8)              |
| Government               | 1 (0.6)       | 1 (0.7)         | 4 (2.2)                |
| None                     | 3 (1.9)       | 1 (0.7)         | 2 (1.1)                |
| Prior Child Mortality    |               |                 |                        |
| Rate/1000 live births    | 107.7 (192.5) | 113.5 (194.4)   | 113.2 (171.5)          |
| ≥1 prior child deaths    | 44 (28.0)     | 44 (28.6)       | 65 (35.1)              |
| Electricity in House     | 71 (32.9)     | 55 (28.2)       | 72 (30.3)              |
| Ownership                |               |                 |                        |
| Bicycle                  | 107 (49.5)    | 84 (43.1)       | 104 (43.7)             |
| Cart                     | 23 (10.7)     | 15 (7.7)        | 19 (8.0)               |
| Radio                    | 46 (21.3)     | 37 (19.0)       | 57 (24.0)              |
| TV                       | 37 (17.1)     | 32 (16.4)       | 55 (23.1)              |
| khet-Paddy farm land     | 92 (43.2)     | 63 (32.8)       | 78 (33.2)              |
| Bari-Non-paddy farm land | 31 (14.6)     | 43 (22.3)       | 52 (22.0)              |
| Cattle                   | 122 (56.5)    | 84 (43.1)       | 116 (48.7)             |
| Goats                    | 90 (41.7)     | 80 (41.0)       | 109 (45.8)             |
| House Wall Material      |               |                 |                        |
| None                     | 1 (0.5)       | 0 (0.0)         | 1 (0.4)                |
| Thatch                   | 12 (5.6)      | 47 (24.1)       | 37 (15.6)              |
| Mud                      | 177 (81.9)    | 138 (70.8)      | 161 (67.7)             |
| Wood                     | 5 (2.3)       | 0 (0.0)         | 10 (4.2)               |
| Concrete                 | 21 (9.7)      | 10 (5.1)        | 29 (12.2)              |
| House Roof Material      |               |                 |                        |
| None                     | 3 (1.4)       | 0 (0.0)         | 1 (0.4)                |
| Thatch                   | 19 (8.8)      | 38 (19.5)       | 39 (16.4)              |
| Tile/Tin                 | 190 (88.0)    | 154 (79.0)      | 187 (78.6)             |
| Concrete                 | 4 (1.9)       | 3 (1.5)         | 11 (4.6)               |
| Latrine at House         | 13 (6.0)      | 7 (3.6)         | 21 (8.8)               |
| Water Source             |               |                 |                        |
| Tube well                | 215 (99.5)    | 190 (97.4)      | 231 (97.1)             |
| Ring well                | 1 (0.5)       | 5 (2.6)         | 7 (2.9)                |

Online Supplemental Materials

Supplemental Table 5. Distribution and numbers of tablets consumed by iron+folic acid, iron+folic acid and zinc, and placebo groups among those not yet walking at the start of the trial<sup>1</sup>

|                                                   | Placebo           | Iron+Folic Acid               | Iron+Folic Acid & Zinc         |
|---------------------------------------------------|-------------------|-------------------------------|--------------------------------|
| All enrolled children                             | 216               | 195                           | 238                            |
| Tablets consumed                                  |                   |                               |                                |
| 0-59                                              | 87 (40.3)         | 68 (34.9)                     | 72 (30.3)                      |
| 60-179                                            | 43 (19.9)         | 52 (26.7)                     | 60 (25.2)                      |
| 180-364                                           | 78 (36.1)         | 66 (33.9)                     | 92 (38.7)                      |
| > 364                                             | 8 (3.7)           | 9 (4.6) (p=0.37) <sup>2</sup> | 14 (5.9) (p=0.11) <sup>3</sup> |
| Mean±SD                                           | 142.1±130.3       | 138.1±118.8                   | 163.3±130.6                    |
| Median % of total possible tablets consumed (IQR) | 45.5 (8.6-68.8)   | 40.0 (13.3-63.5)              | 53.2 (18.5-74.1)               |
| Infants < 12 mo at entry                          | 183               | 170                           | 211                            |
| Tablets consumed                                  |                   |                               |                                |
| 0-59                                              | 58 (31.7)         | 43 (25.3)                     | 50 (23.7)                      |
| 60-179                                            | 39 (21.3)         | 52 (30.6)                     | 56 (26.5)                      |
| 180-364                                           | 78 (42.6)         | 66 (38.8)                     | 91 (43.1)                      |
| > 364                                             | 8 (4.4)           | 9 (5.3) (p=0.20) <sup>2</sup> | 14 (6.6) (p=0.23) <sup>3</sup> |
| Mean±SD                                           | 164.4±128.8       | 157.5±114.9                   | 180.5±127.8                    |
| Median % of total possible tablets consumed (IQR) | 52.1 (14.3- 72.7) | 45.7 (22.2-64.2)              | 57.5 (27.6-77.3)               |

<sup>1</sup> Values are n (%), means ±SD, or median % of total possible tablets consumed (interquartile range)

<sup>2</sup> Chi-square comparison of distributions of tablet consumption between placebo and iron+folic acid groups

<sup>3</sup> Chi-square comparison of distributions of tablet consumption between placebo and iron+folic acid and zinc groups

Online Supplemental Materials

Supplemental Table 6: Mean ages at first sitting unassisted, running, jumping, and standing on one leg, and % > than 8, 24, 30, and 30 mo of age, respectively, at which these milestones were first attained among children having not yet attained them at baseline among iron+folic acid, iron+olic acid and zinc, and placebo treatment groups<sup>1</sup>

| Treatment Group            | n   | Age, d      | Mean Difference (95% CI) |                     | >18 mo, n (%) | Relative Risk (95% CI) |                   |
|----------------------------|-----|-------------|--------------------------|---------------------|---------------|------------------------|-------------------|
|                            |     |             | Crude                    | Adjusted            |               | Crude                  | Adjusted          |
| <b>Sitting unassisted</b>  |     |             |                          |                     |               |                        |                   |
| Placebo                    | 107 | 210.6±32.9  |                          |                     | 22 (20.6)     |                        |                   |
| Iron+folic acid            | 99  | 214.1±35.0  | 3.5 (-5.9, 12.8)         | 0.5 (-10.3, 11.2)   | 21 (21.2)     | 1.03 (0.61, 1.76)      | 0.80 (0.44, 1.47) |
| Iron-folic acid and zinc   | 123 | 211.4±36.1  | 0.8 (-8.3, 9.8)          | -2.3 (-12.2, 7.6)   | 23 (18.7)     | 0.91 (0.54, 1.54)      | 0.62 (0.33, 1.17) |
| <b>Running</b>             |     |             |                          |                     |               |                        |                   |
| Placebo                    | 219 | 564.1±117.0 |                          |                     | 20 (9.1)      |                        |                   |
| Iron+folic acid            | 194 | 559.3±106.0 | 4.9 (-26.5, 16.9)        | -1.9 (-24.1, 20.3)  | 13 (6.7)      | 0.73 (0.38, 1.44)      | 0.72 (0.33, 1.58) |
| Iron+folic acid and zinc   | 243 | 551.9±122.0 | -12.3 (-34.2, 9.7)       | 5.8 (-15.6, 27.2)   | 25 (10.3)     | 1.13 (0.64, 1.97)      | 1.22 (0.63, 2.34) |
| <b>Jumping</b>             |     |             |                          |                     |               |                        |                   |
| Placebo                    | 194 | 744.0±160.3 |                          |                     | 33(17.0)      |                        |                   |
| Iron+folic acid            | 179 | 733.8±146.3 | -10.2 (-41.5, 21.2)      | -12.9 (-40.0, 14.1) | 25(14.0)      | 0.82 (0.51, 1.32)      | 0.79 (0.50, 1.24) |
| Iron+folic acid and zinc   | 251 | 723.5±141.9 | -20.5 (-48.7, 7.7)       | 5.8 (-18.76, 30.2)  | 28(11.26)     | 0.66 (0.41, 1.05)      | 0.84 (0.57, 1.25) |
| <b>Standing on one leg</b> |     |             |                          |                     |               |                        |                   |
| Placebo                    | 231 | 794.8±140.1 |                          |                     | 53 (22.9)     |                        |                   |
| Iron+folic acid            | 181 | 825.0±154.7 | 30.3 (-1.6, 58.9)        | 18.8 (-6.3, 44.0)   | 57 (31.4)     | 1.37 (1.00, 1.89)      | 1.23 (0.76, 1.99) |
| Iron+folic acid and zinc   | 327 | 778.6±162.5 | -16.2 (-42.1, 9.8)       | -0.8 (-22.4, 20.7)  | 79 (24.2)     | 1.05 (0.78, 1.43)      | 0.97 (0.60, 1.54) |

<sup>1</sup> Values are means ±SD, means difference (95% CI), n (%), or relative risk (95% CI)

All adjusted differences and relative risks adjusted for ethnicity, assets, maternal literacy, prior child deaths using Generalized Estimating Equations (GEE).
